# Supplementary figures and images for: FlpS, the FNR-Like Protein of Streptococcus suis Is an Essential, Oxygen-Sensing Activator of the Arginine Deiminase System
Source: MDPI journal article supplement (doi:10.3390/pathogens5030051), 2016-07-21

Supplementary Figure S1

A

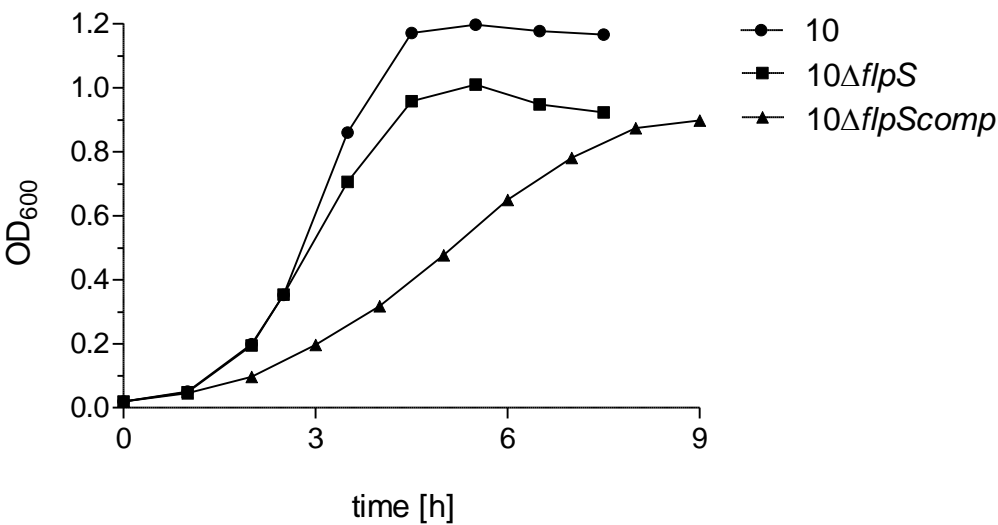

B

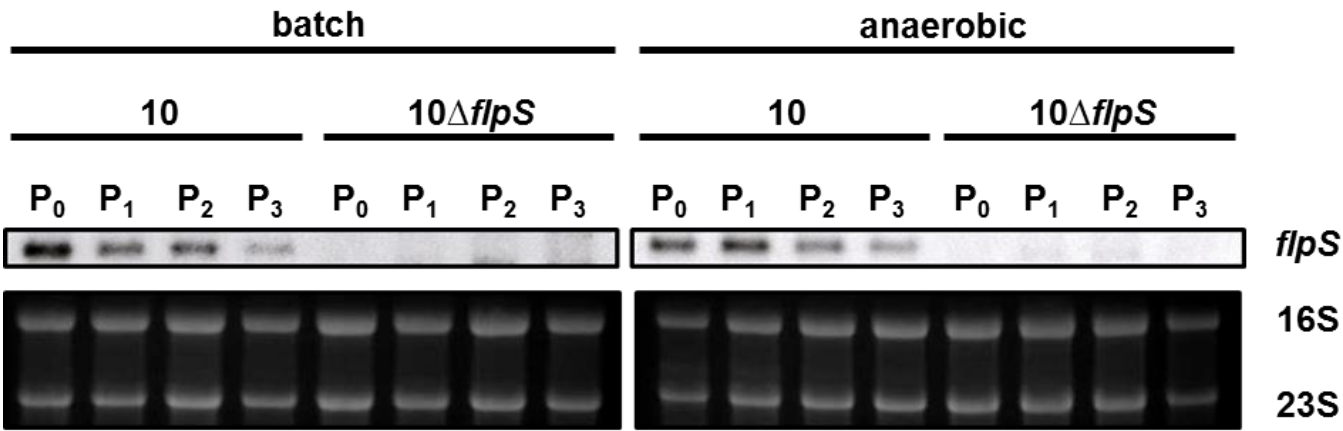

Supplement: s1 [file s1]
